## RESEARCH ARTICLE

# Prevalence of Thiamine Deficiency in Pregnancy and its impact on fetal outcome in an area endemic for thiamine deficiency

Ozaifa Kareem<sup>1\*</sup>, Samiya Mufti<sup>2</sup>, Sobia Nisar<sup>3\*</sup>, Masood Tanvir<sup>3</sup>, Umar Muzaffer<sup>3</sup>, Nahida Ali<sup>3</sup>, Ishfaq Ahmad Sheikh<sup>3</sup>, Ghulam Nabi Bader<sup>1\*</sup>

**1** Department of Pharmaceutical Sciences, University of Kashmir, Srinagar, India, **2** Department of Gynecology and Obstetrics, Government Medical College, Wazir Bagh, India, **3** Department of Medicine, Government Medical College, Srinagar, India

\* ozaifa\_scholar@kashmiruniversity.net (OK); sobianisar78@gmail.com (SN); gnbader@kashmiruniversity.ac.in (GNB)

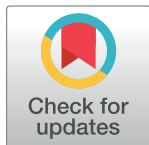

## Abstract

### Background

Pregnancy is a metabolically challenging state with increased nutritional demand. Thiamine is an important cofactor in various metabolic pathways and thus its deficiency could have a serious impact on both maternal and fetal outcomes. Kashmir has thiamine deficiency in endemic proportions, with multiple reports of infantile beriberi, postpartum neuropathy, and gastric beriberi. This prompted us to assess the extent of the burden of thiamine deficiency during pregnancy.

### Methods

This cross-sectional study was conducted for a period of two years in pregnant women attending the antenatal clinic. A demographic, clinical, biochemical, and dietary assessment was done in all participants. The whole blood thiamine levels were assessed by high-performance liquid chromatography.

### Results

A total of 492 participants were included in the study with a mean age of  $30.30 \pm 4.57$  years and a mean BMI of  $24.25 \pm 3.32$  Kg/m<sup>2</sup>. The mean whole blood thiamine level of all participants was  $133.29 \pm 14.32$  nmol/L. Low thiamine status was present in 38.2% (n = 188) of participants. Participants with low thiamine had poor perinatal outcomes, with 3.1% (n = 6) reporting early infant death.

### Conclusion

A high prevalence of thiamine deficiency occurs in pregnant women of Kashmir. Low thiamine is associated with poor nutritional status as well as poor perinatal outcomes.

## OPEN ACCESS

**Citation:** Kareem O, Mufti S, Nisar S, Tanvir M, Muzaffer U, Ali N, et al. (2023) Prevalence of Thiamine Deficiency in Pregnancy and its impact on fetal outcome in an area endemic for thiamine deficiency. *PLoS Negl Trop Dis* 17(5): e0011324. <https://doi.org/10.1371/journal.pntd.0011324>

**Editor:** Kirkby D. Tickell, University of Washington, UNITED STATES

**Received:** November 29, 2022

**Accepted:** April 20, 2023

**Published:** May 30, 2023

**Copyright:** © 2023 Kareem et al. This is an open access article distributed under the terms of the [Creative Commons Attribution License](https://creativecommons.org/licenses/by/4.0/), which permits unrestricted use, distribution, and reproduction in any medium, provided the original author and source are credited.

**Data Availability Statement:** All the necessary data has been given within the main manuscript itself.

**Funding:** The authors received no specific funding for this work.

**Competing interests:** The authors have declared that no competing interests exist.

## Trial registration

[CTRI/2022/07/044217](https://www.clinicaltrials.gov/ct2/show/study?term=CTRI/2022/07/044217).

### Author summary

Thiamine is an essential micronutrient with a pivotal role in mitochondrial energetics and oxidative and nonoxidative carbohydrate metabolism. Thiamine deficiency is a frequently neglected problem of significance across Southeast Asia, where beriberi is endemic. There are multiple reports of infantile beriberi, gastric beriberi, high-output heart failure and postpartum neuropathy from Kashmir, a northern Indian state. The reports of infantile beriberi in exclusively breastfed infants suggest maternal thiamine deficiency during pregnancy. Additionally, pregnancy puts a physiological strain on micronutrient physiology to fulfil the demands of the mother, placenta, and fetus. Although recent studies have reported thiamine deficiency-related diseases in the region, this is the first representative data assessing the biochemical evidence of thiamine deficiency in pregnant women from Kashmir. We conducted a cross-sectional explorative study to describe the prevalence of thiamine deficiency in pregnant women of Kashmir and its perinatal outcome. A total of 492 women across three trimesters of pregnancy were enrolled for the study. We found a high prevalence (38.2%) of thiamine deficiency among pregnant women of Kashmir. The low thiamine status was associated with poor socioeconomic status, poor nutritional status and higher consumption of staple polished white rice, and tea. Our study also reported poor perinatal outcome in association with the low thiamine status of the mother, suggesting a possibility of thiamine deficiency in the early neonatal period.

### Introduction

Vitamin B1, also known as thiamine, is a water-soluble vitamin that is pivotal in several metabolic pathways [1]. Thiamine diphosphate (ThDP), an active form of thiamine, is utilized by the major enzyme complexes involved in carbohydrate metabolism (for energy production by ATP synthesis), lipid metabolism (for production and maintenance of myelin sheath in the brain), and the production of amino acids and glucose-derived neurotransmitters (e.g., glutamic acid; GABA) [2]. Since thiamine is not synthesized endogenously and has a short half-life (1–12 hr), an adequate dietary supply is needed to maintain tissue thiamine levels [3]. Deficiency of this vitamin leads to various cardiovascular and neurological consequences in adults [4], collectively known as ‘beriberi’ [5]. Classically, cardiovascular sequelae are known as wet beriberi while neurological features are referred to as dry beriberi [3]. While being nearly eradicated elsewhere, thiamine deficiency remains a public health concern in many parts of the world, especially in Southeast Asia [6].

Pregnancy places a unique physiological strain on micronutrient physiology in order to fulfil the demands of the mother, placenta, and fetus [7]. Newborns are at an increased danger of developing thiamine deficiency if the thiamine levels of their mothers are inadequate during pregnancy and/or lactation [8]. It has previously been reported that the fetus receives thiamine preferentially through the placental transfer at the expense of the mother [9]. However, lactating women with subclinical thiamine deficiency secrete a suboptimal amount of thiamine in breast milk, predisposing the infants to overt infantile beriberi [10]. It is interesting to note that it is not uncommon for infants to show symptoms of beriberi while their mothers

continue to show no signs of the disease [11,12]. New evidence suggests that infants with milder forms of thiamine deficiency, those not severe enough to cause beriberi, can still be capable of causing cognitive impairments later in life [13]. Subclinical thiamine deficiency in pregnant mothers has also been reported to adversely affect the balance, fine motor skills and language development in preschool children [13,14].

Recently, a number of reports of infantile beriberi in exclusively breastfed infants have been reported from Kashmir, [15–18] suggesting maternal thiamine deficiency during pregnancy. This has essentially been related to a high carbohydrate diet (in the form of rice) poor in thiamine [19]. The peculiar regional dietary habits along with the postpartum dietary restrictions have likely been implicated as a cause of thiamine deficiency in this region [20–22]. Barring a few reports of postpartum polyneuropathy due to thiamine deficiency [23], there is no data available to substantiate the thiamine status or the burden of thiamine deficiency in pregnant women of Kashmir or its impact on neonatal outcomes. In view of the various reported cases of infantile beriberi, and the possibility of subclinical deficiency affecting neurocognitive development, we suspect a high prevalence of thiamine deficiency in pregnancy. Herein, we report the clinical characteristics, laboratory findings, and whole-blood thiamine levels in pregnant women of Kashmir valley.

## Participants and methods

### Ethics statement

The ethical approval for the study was obtained from the Institutional Ethical Committee, Government Medical College, Srinagar vide No: 255/ETH/GMC/ICMR dated 14/4/2021. A well-informed written consent was taken from all the study participants. The procedures followed were in accordance with the Helsinki Declaration.

This cross-sectional explorative study was conducted in Government Medical College and associated hospitals for two years, from November 2020 to October 2022. Pregnant women, across all three trimesters, attending the antenatal clinic were enrolled. The study was registered with the Clinical Trial Registry of India under CTRI registration no. [CTRI/2022/07/044217](https://ctri.nic.in/Clinicaltrials/showstudy?ids=CTRI/2022/07/044217). Eligibility criteria included all the pregnant women attending the antenatal clinic while those who did not provide consent or were taking thiamine-containing supplements were excluded. A total of 567 were screened, of which 27 refused to participate, 19 refused to give a blood sample, 8 had a history of multivitamin intake, 11 were lactating and 10 had a complicated pregnancy. A detailed standardized study questionnaire was administered to all the participants and information regarding demographics, anthropometry, and clinical assessment was done. The data regarding socioeconomic status was also taken. A detailed dietary pattern was obtained by employing a Food Frequency Questionnaire (FFQ) and 24-h dietary recall to assess the various diet components using diet software that was specifically built for this purpose (Diet Cal, Profound Tech Solutions, New Delhi, India). The infant mortality was estimated by verbal autopsy at the time of follow-up of patients.

A 5 ml venous blood was collected from all the participants by phlebotomy in VACUTECH K3-EDTA-containing tubes and VACUTECH gel+clot activator tubes (*Vacurette, Greiner Bio One, Austria*). Samples were transferred immediately to the central facility within 4 hours of collection. The samples were separated into 500  $\mu$ L aliquots and frozen at  $-20^{\circ}\text{C}$  and were batch-transported every day on dry ice for whole-blood thiamine analysis. Whole blood thiamine analysis was done using a modified method of Körner et al. 2009 [24]. Aliquots of blood samples were briefly thawed and treated with 400  $\mu$ L of 1.5 M trichloroacetic acid to precipitate proteins and subsequent centrifugation. The prepared sample was run through ultra-high performance liquid chromatography (HPLC) (*Agilent model 1260 system, Infinity II, Singapore*)

with a fluorescence detector (*Agilent model G7121A, Agilent Technologies, Singapore*) and an autosampler (*Agilent model G4294B, Agilent Technologies, Singapore*) to allow for online pre-column derivatization with potassium ferricyanide. Coats and colleagues [25] have employed a reference range of whole-blood thiamine levels of 70–180 nmol/L among self-reported healthy American adults. Similarly, based on values from 68 healthy Dutch blood donors and laboratory staff aged 20–50 years the Institute of Medicine (IOM) [26] has defined thiamine deficiency as whole-blood thiamine levels of <70 nmol/L and marginal deficiency as 70–90 nmol/L. Although there are no universally agreed-upon cut-offs for thiamine status as measured by ThDP [27], however, a whole-blood ThDP cut-off of <74 nmol/L corresponding to 2.5 µg/dL was employed in our study, which aligns with the reference interval set by Lu and Frank [28]. Based on this, our study population was divided into two groups, normal thiamine, and low thiamine group.

The statistical analysis was conducted using SPSS version 26.0 (IBM, Armonk, NY, USA). Data was evaluated for normal distribution as per Kolmogorov–Smirnov test. Continuous variables were expressed as mean ± SD. Comparison for continuous variables was estimated by Mann–Whitney U test (parametric variables) and Kruskal–Wallis test (non-parametric variables) and categorical data were compared by  $\chi^2$  test. For comparison of demographic and biochemical parameters between the normal thiamine and low thiamine group, we used paired independent simple t-test. For all comparisons p-value  $\leq 0.05$  was considered significant.

## Results

A total of 492 participants were enrolled for the study. The demographic and biochemical characteristics of the study participants are given in Table 1. The average age of the study population was  $30.30 \pm 4.57$  years. The mean BMI of the population was  $24.25 \pm 3.32$  Kg/m<sup>2</sup>. Among all, 8.4% (n = 42) were in the first trimester, 22.4% (n = 113) were in the second trimester, and 67% (n = 337) were in the third trimester of pregnancy (Table 2). The mean whole blood thiamine level of all participants was  $133.29 \pm 14.32$  nmol/L. The mean thiamine of the participants registered in the first trimester was  $141.52 \pm 5.88$  nmol/L. Those belonging to the second trimester had a mean thiamine level of  $133.75 \pm 3.91$  nmol/L, and those in the third trimester had an average whole blood thiamine of  $130.41 \pm 4.98$  nmol/L. Low thiamine status was present in 38.2% (n = 188) while 61.7% (n = 304) had normal thiamine levels. Nearly 59.3% of participants (n = 292) belonged to the lower-middle socioeconomic status of which the majority of participants 66.5% (n = 125) belonged to the low-thiamine group while only 54.9% (n = 167) belonged to the normal thiamine group (p = 0.031).

The anthropometric parameters were comparable among the two groups while some biochemical parameters were significantly different. The mean serum urea of the participants was  $26.32 \pm 6.53$  mg/dL which was significantly lower in the low-thiamine group ( $25.15 \pm 6.34$  mg/dL) compared to normal thiamine participants ( $27.81 \pm 6.88$  mg/dL) (p = 0.024). The total protein ( $6.99 \pm 0.71$  g/dL) (p = 0.037) and albumin ( $3.89 \pm 0.63$  g/dL) (p = 0.029) were also significantly lower in the low-thiamine group. The mean random blood sugar of study participants was  $95.30 \pm 21.40$  mg/dL, while the low-thiamine group had low random blood sugar ( $93.80 \pm 18.07$  mg/dL) compared to women with normal thiamine ( $97.74 \pm 25.77$  mg/dL) (p = 0.047). The mean haemoglobin was also lower in the low-thiamine group ( $8.81 \pm 1.40$  g/dL) compared to the normal thiamine group ( $10.22 \pm 1.34$  g/dL) (p = 0.038). The red blood cell count was again lower in the low-thiamine group ( $3.87 \pm 0.55 \times 10^3$ /mL) compared to the normal thiamine group ( $4.12 \pm 0.59 \times 10^3$ /mL) (p = 0.028).

The majority of participants were gravida first at presentation belonging to the third trimester of pregnancy (68.5%) (Table 2). There was a higher proportion of low-thiamine women

**Table 1. Demographic and biochemical parameters of the study population (n = 492).**

| Parameter                                     | All Participants (Mean±S.D) | Low thiamine (Mean±S.D) | Normal thiamine (Mean±S.D) | P-value |
|-----------------------------------------------|-----------------------------|-------------------------|----------------------------|---------|
| Age (years)                                   | 30.30±4.57                  | 30.08±4.740             | 30.44±4.46                 | 0.397   |
| BMI (kg/m <sup>2</sup> )                      | 24.25±3.32                  | 24.26±3.29              | 24.25±3.34                 | 0.616   |
| Systolic blood pressure, mmHg                 | 123.24±14.50                | 124.34±13.59            | 122.56±15.02               | 0.182   |
| Diastolic blood pressure, mmHg                | 79.83±11.30                 | 80.52±10.90             | 79.41±11.53                | 0.284   |
| Pulse (beats/min)                             | 90.45±12.91                 | 91.41±13.08             | 89.85±12.79                | 0.188   |
| Serum urea, mg/dL                             | 26.32±6.53                  | 25.15±6.34              | 27.81±6.88                 | 0.024   |
| Serum creatinine, mg/dL                       | 0.88±0.21                   | 0.87±0.15               | 0.85±0.17                  | 0.118   |
| Serum bilirubin, mg/dL                        | 0.58±0.47                   | 0.56±0.30               | 0.61±0.47                  | 0.283   |
| Serum total protein, g/dL                     | 7.28±0.75                   | 6.99±0.71               | 7.32±0.69                  | 0.037   |
| Serum albumin, g/dL                           | 4.20±0.61                   | 3.89±0.63               | 4.33±0.60                  | 0.029   |
| Uric acid, mg/dL                              | 4.55±1.26                   | 4.76±1.26               | 4.75±1.28                  | 0.890   |
| Serum glutamic oxaloacetic transaminase, IU/L | 34.24±10.98                 | 30.46±10.64             | 30.43±22.45                | 0.287   |
| Serum glutamic pyruvic transaminase, IU/L     | 31.06±25.38                 | 30.22±22.73             | 32.52±26.29                | 0.850   |
| Serum alkaline phosphatase, IU/L              | 103.40±7.14                 | 99.15±28.29             | 106.02±27.39               | 0.195   |
| Serum sodium, mEq/L                           | 136.67±7.30                 | 136.63±7.06             | 136.69±7.4                 | 0.931   |
| Serum potassium, mEq/L                        | 4.21±1.80                   | 4.32±3.03               | 4.14±2.65                  | 0.469   |
| Blood glucose random, mg/dL                   | 95.30±21.40                 | 93.80±18.07             | 97.74±25.77                | 0.047   |
| TSH                                           | 5.17±3.34                   | 5.34±3.23               | 5.06±3.41                  | 0.369   |
| Hemoglobin g/dL                               | 9.76±1.36                   | 8.81±1.40               | 10.22±1.34                 | 0.038   |
| Neutrophil count *10 <sup>3</sup> /mL         | 66.93±13.71                 | 64.95±18.15             | 67.58±12.11                | 0.583   |
| Red Blood cell count *10 <sup>3</sup> /mL     | 3.95±0.57                   | 3.87±0.55               | 4.12±0.59                  | 0.028   |
| Lymphocyte count %                            | 27.22±12.01                 | 30.41±13.13             | 25.82±11.30                | 0.071   |
| White blood cell count, *10 <sup>9</sup> /L   | 8.78±6.11                   | 10.02±10.13             | 8.53±3.00                  | 0.229   |
| Blood thiamine diphosphate, nmol/L            | 133.29±14.32                | 46.25±18.10             | 187.12±115.61              | 0.001   |

<https://doi.org/10.1371/journal.pntd.0011324.t001>

who experienced nausea [82.1% vs 69.9% ( $p = 0.047$ )] and vomiting [73.6% vs 61.6% ( $p = 0.05$ )] compared to participants with normal thiamine. Women with low thiamine had a significant history of loss of appetite [70.5% vs 53.5% ( $p = 0.036$ )], lethargy [17.5% vs 9.5% ( $p = 0.001$ )] and compared to participants with normal thiamine. Compared to normal thiamine low thiamine status was associated with increased heart rate  $>100$  bpm [6.2% vs 14.3% ( $p = 0.032$ )], and PND/Orthopnoea [2.3% vs 9.1% ( $p = 0.042$ )]. Anaemia (defined as Hb  $< 10.9$  g/dl [29]) was significantly associated with low thiamine status as against the women with normal thiamine [6.3% vs 1.6% ( $p = 0.016$ )].

All the participants consumed rice as a staple diet and there was more number of women with low thiamine status who consumed higher proportions of polished white ration rice (60.6%), compared to locally grown Kashmiri rice (25.1%) ( $p = 0.004$ ). The rice was customarily washed three times by the majority of women (56.4%) with low thiamine while only two times by most women (36.8%) with normal thiamine status. Low thiamine status of women was significantly associated with the cooking practice of discarding fluids after boiling the rice compared to those not discarding fluids after boiling [72.3% vs 51.3% ( $p = 0.051$ )]. The higher consumption of tea, mostly Kashmiri pink tea, was significantly associated with low thiamine status with more women (87.8%) with low thiamine consuming more than two cups of tea daily and only 73.1% with normal thiamine consuming two cups daily ( $p = 0.071$ ). The consumption of pickles was also higher in the low thiamine group with 48.5% reporting consuming pickles occasionally and 14.9% having them daily. Among women with normal thiamine, occasional pickle intake was reported in 61.5% and daily intake in 5.6% ( $p = 0.031$ ).

Table 2. Characteristics of the study population (n = 492).

| Characteristic                             | All Participants (n = 492) | Low thiamine Group (n = 188) | Normal thiamine Group (n = 304) | P-value |
|--------------------------------------------|----------------------------|------------------------------|---------------------------------|---------|
| <b>SE Status</b>                           |                            |                              |                                 |         |
| Lower                                      | 27 (5.4)                   | 10 (5.3)                     | 17 (5.6)                        | 0.031   |
| Upper lower                                | 160 (32.5)                 | 50 (26.6)                    | 110 (36.2)                      |         |
| Lower middle                               | 292 (59.3)                 | 125 (66.5)                   | 167 (54.9)                      |         |
| Upper middle                               | 14 (2.8)                   | 3 (1.6)                      | 10 (3.3)                        |         |
| <b>Gravida</b>                             |                            |                              |                                 |         |
| 1                                          | 222 (45.2)                 | 85 (45.2)                    | 137 (45.0)                      | 0.488   |
| 2                                          | 122 (24.8)                 | 41 (21.9)                    | 81 (26.7)                       |         |
| 3                                          | 87 (17.7)                  | 40 (21.2)                    | 47 (15.5)                       |         |
| >3                                         | 61 (12.3)                  | 22 (11.7)                    | 39 (12.8)                       |         |
| <b>Para</b>                                |                            |                              |                                 |         |
| 0                                          | 223 (45.3)                 | 85 (45.2)                    | 138 (45.4)                      | 0.703   |
| 1                                          | 140 (28.5)                 | 49 (26.1)                    | 91 (30.0)                       |         |
| 2                                          | 85 (17.3)                  | 37 (19.6)                    | 48 (15.7)                       |         |
| >2                                         | 44 (8.9)                   | 17 (9.1)                     | 27 (8.9)                        |         |
| <b>Trimester</b>                           |                            |                              |                                 |         |
| First                                      | 42 (8.6)                   | 17 (9.1)                     | 25 (8.2)                        | 0.167   |
| Second                                     | 113 (22.9)                 | 39 (20.7)                    | 74 (24.3)                       |         |
| Third                                      | 337 (68.5)                 | 132 (70.2)                   | 205 (67.5)                      |         |
| <b>Loss of appetite</b>                    |                            |                              |                                 |         |
| First trimester                            | 195 (38.8)                 | 78 (41.4)                    | 117 (38.4)                      | 0.036   |
| Second trimester                           | 11 (2.2)                   | 10 (5.3)                     | 1 (0.3)                         |         |
| Third trimester                            | 8 (1.6)                    | 7 (3.7)                      | 1 (0.3)                         |         |
| 1&2 trimester                              | 69 (13.7)                  | 35 (18.6)                    | 34 (11.2)                       |         |
| All trimesters                             | 13 (2.5)                   | 3 (1.5)                      | 10 (3.3)                        |         |
| <b>Nausea during pregnancy</b>             |                            |                              |                                 |         |
| First trimester                            | 251 (49.9)                 | 97 (51.5)                    | 154 (50.6)                      | 0.047   |
| Second trimester                           | 7 (1.4)                    | 5 (2.6)                      | 2 (0.6)                         |         |
| Third trimester                            | 6 (1.2)                    | 5 (2.6)                      | 1 (0.3)                         |         |
| 1&2 trimester                              | 78 (15.5)                  | 37 (19.6)                    | 41 (13.5)                       |         |
| All trimesters                             | 26 (5.2)                   | 11 (5.8)                     | 15 (4.9)                        |         |
| <b>Vomiting During Pregnancy</b>           |                            |                              |                                 |         |
| First trimester                            | 214 (42.5)                 | 84 (44.6)                    | 130 (42.7)                      | 0.05    |
| Second trimester                           | 13 (2.5)                   | 12 (6.3)                     | 1 (0.3)                         |         |
| Third trimester                            | 9 (1.7)                    | 7 (3.7)                      | 2 (0.6)                         |         |
| 1&2 trimester                              | 70 (13.9)                  | 27 (14.3)                    | 43 (14.1)                       |         |
| All trimesters                             | 21 (4.1)                   | 9 (4.7)                      | 12 (3.9)                        |         |
| <b>Number of Retching Episodes Per Day</b> |                            |                              |                                 |         |
| 1                                          | 198 (39.4)                 | 81 (43.1)                    | 117 (38.4)                      | 0.036   |
| 2                                          | 17 (3.4)                   | 7 (3.7)                      | 10 (3.2)                        |         |
| >2                                         | 33 (6.5)                   | 25 (13.2)                    | 8 (2.6)                         |         |
| <b>Weight loss</b>                         | 2(0.4)                     | 0 (0.0)                      | 2 (0.6)                         | 0.277   |
| <b>Orthostatic hypotension</b>             | 12(2.4)                    | 3 (1.6)                      | 9 (2.9)                         | 0.569   |
| <b>Heart rate &gt;100 bpm</b>              | 46 (9.2)                   | 27 (14.3)                    | 19 (6.2)                        | 0.032   |
| <b>Dry Skin</b>                            | 1(0.2)                     | 1 (0.5)                      | 0 (0)                           | 0.471   |
| <b>Mood Changes</b>                        | 19 (3.9)                   | 4 (2.1)                      | 15 (4.9)                        | 0.187   |
| <b>Lethargy</b>                            | 62 (12.4)                  | 33 (17.5)                    | 29 (9.5)                        | 0.001   |

(Continued)

Table 2. (Continued)

| Characteristic                              | All Participants (n = 492) | Low thiamine Group (n = 188) | Normal thiamine Group (n = 304) | P-value |
|---------------------------------------------|----------------------------|------------------------------|---------------------------------|---------|
| PIH                                         | 45 (9.1)                   | 19 (10.1)                    | 26 (8.5)                        | 0.563   |
| GDM                                         | 36 (7.3)                   | 12 (6.3)                     | 24 (7.8)                        | 0.442   |
| Anaemia                                     | 17 (3.4)                   | 12 (6.3)                     | 5 (1.6)                         | 0.016   |
| Dysuria                                     | 28 (5.6)                   | 16 (8.5)                     | 12 (3.9)                        | 0.085   |
| PND/Orthopnoea                              | 24 (4.8)                   | 17 (9.1)                     | 7 (2.3)                         | 0.042   |
| <b>Type of rice</b>                         |                            |                              |                                 |         |
| Kashmiri                                    | 198 (40.2)                 | 47 (25.1)                    | 151 (49.6)                      | 0.004   |
| Ration                                      | 254 (51.6)                 | 114 (60.6)                   | 140 (46.1)                      |         |
| Both                                        | 40 (8.2)                   | 27 (14.3)                    | 13 (4.3)                        |         |
| <b>Storage</b>                              |                            |                              |                                 |         |
| Bins                                        | 396 (80.5)                 | 111 (59.1)                   | 285 (93.8)                      | 0.212   |
| Kutch                                       | 96 (19.5)                  | 77 (40.9)                    | 19 (6.2)                        |         |
| <b>Storage of grain</b>                     |                            |                              |                                 |         |
| Same year                                   | 445 (90.4)                 | 150 (79.7)                   | 295 (97.1)                      | 0.231   |
| One Year                                    | 32 (6.5)                   | 28 (14.9)                    | 4 (1.3)                         |         |
| Two year                                    | 15 (3.1)                   | 10 (5.4)                     | 5 (1.6)                         |         |
| <b>Preparation of rice</b>                  |                            |                              |                                 |         |
| One rice wash                               | 97 (19.8)                  | 1 (0.5)                      | 96 (31.6)                       | 0.021   |
| Two rice washes                             | 173 (35.1)                 | 61 (32.5)                    | 112 (36.8)                      |         |
| Three rice washes                           | 190 (38.6)                 | 106 (56.4)                   | 84 (27.7)                       |         |
| Four rice washes                            | 32 (6.5)                   | 20 (10.6)                    | 12 (3.9)                        |         |
| Discarding cooking water after boiling rice | 292 (59.3)                 | 136 (72.3)                   | 156 (51.3)                      | 0.051   |
| Green leafy vegetables                      | 456 (92.6)                 | 180 (95.7)                   | 276 (90.7)                      | 0.241   |
| <b>No. of cups of tea per day</b>           |                            |                              |                                 |         |
| 1                                           | 78 (15.8)                  | 8 (4.3)                      | 70 (23.1)                       | 0.071   |
| 2                                           | 237 (48.1)                 | 15 (7.9)                     | 222 (73.1)                      |         |
| >2                                          | 177 (35.9)                 | 165 (87.8)                   | 12 (3.8)                        |         |
| <b>Intake of Pickle</b>                     |                            |                              |                                 |         |
| Occasional intake                           | 278 (56.5)                 | 91 (48.5)                    | 187 (61.5)                      | 0.031   |
| Daily intake                                | 45 (9.1)                   | 28 (14.9)                    | 17 (5.6)                        |         |

<https://doi.org/10.1371/journal.pntd.0011324.t002>

The dietary pattern of the study participants is given in Table 3. The total energy consumption per day was  $1421.43 \pm 170.11$  Kcal/day for women with low thiamine status and  $1723.51 \pm 87.89$  Kcal/day for women with normal thiamine levels ( $p = 0.024$ ). The total thiamine consumption per day among women with low thiamine status was  $0.70 \pm 0.15$  mg/day and  $0.81 \pm 0.13$  mg/day among women with normal thiamine status ( $p = 0.048$ ). The average calories derived from proteins were lower in women with low thiamine status ( $190.12 \pm 28.56$ ) compared to those with normal thiamine ( $219.08 \pm 14.72$ ) ( $p = 0.047$ ). The average calories derived from carbohydrates per day for women with low thiamine status was  $920.32 \pm 113.48$  Kcal while for women with normal thiamine was  $1058.32 \pm 78.32$  Kcal ( $p = 0.027$ ).

Among women with low thiamine, 3.1% ( $n = 6$ ) reported perinatal mortality while only 0.3% ( $n = 1$ ) in the normal thiamine group reported perinatal mortality ( $p < 0.05$ ). Among six infants, three had respiratory distress and needed resuscitation at birth, two had developed shock within two days of birth and one reportedly had no apparent cause, but the mothers reported vague symptoms like refusal to breastfeed, vomiting, and persistent crying. Additionally, low thiamine was associated with poor perinatal outcomes, with more infants needing

**Table 3. Dietary analysis of the study population.**

| Dietary component                        | Low thiamine Group (n = 188)        | Normal thiamine Group (n = 304)        | P-value      |
|------------------------------------------|-------------------------------------|----------------------------------------|--------------|
| Protein (gms)                            | 47.53±7.14                          | 54.77±3.68                             | 0.043        |
| Total Kcal from protein                  | 190.12±28.56                        | 219.08±14.72                           | 0.047        |
| Total Fat (gms)                          | 38.75±6.35                          | 41.12±7.05                             | 0.325        |
| Total Kcal from fat                      | 348.75±57.15                        | 370±63.45                              | 0.317        |
| Carbohydrate (gms)                       | 230.08±28.37                        | 264.58±19.58                           | 0.049        |
| Total Kcal from carbohydrate             | 920.32±113.48                       | 1058.32±78.32                          | 0.027        |
| <b>Total Energy (Kcal)</b>               | <b>1421.43±170.11</b>               | <b>1723.51±87.89</b>                   | <b>0.024</b> |
| Total Dietary Fibre (gms)                | 24.44±5.32                          | 25.51±5.83                             | 0.594        |
| <b>Micronutrients</b>                    |                                     |                                        |              |
| Thiamine (mgs)                           | 0.70±0.15                           | 0.81±0.13                              | 0.048        |
| Riboflavin (mgs)                         | 0.71±0.13                           | 0.74±0.08                              | 0.081        |
| Calcium (mgs)                            | 549.30±112.83                       | 559±117.60                             | 0.799        |
| Iron (mgs)                               | 7.95±1.75                           | 9.86±1.11                              | 0.048        |
| <b>Food groups</b>                       |                                     |                                        |              |
| Cereals and Millets (g/d)                | 248.60±38.8                         | 286.17±27.96                           | 0.046        |
| Cooked rice (g/d)                        | 466±28.3                            | 513±12.07                              | 0.054        |
| Green Leafy Vegetables (g/d)             | 67.53±22.98                         | 81.81±35.62                            | 0.017        |
| Fruits (g/d)                             | 54.35±4.41                          | 33.49±5.67                             | 0.028        |
| Roots and Tubers (g/d)                   | 35.63±23.91                         | 59.61±32.44                            | 0.044        |
| Milk and Milk Products (g/d)             | 282.66±97.69                        | 251.32±93.75                           | 0.373        |
| Egg and Egg Products (g/d)               | 19.12±1.93                          | 35.39±1.76                             | 0.023        |
| Poultry (g/d)                            | 9.39±3.69                           | 9.80±1.54                              | 0.635        |
| Animal Meat (g/d)                        | 10.12±5.01                          | 14.42±4.30                             | 0.037        |
| Edible Oils and Fats (g/d)               | 17.89±6.09                          | 17.47±3.82                             | 0.807        |
| <b>Percentage of Energy derived from</b> |                                     |                                        |              |
|                                          | <b>Low thiamine Group (n = 188)</b> | <b>Normal thiamine Group (n = 304)</b> |              |
| Total Kcal from protein                  | 13.37%                              | 12.71%                                 |              |
| Total Kcal from fat                      | 24.53%                              | 21.46%                                 |              |
| Total Kcal from carbohydrate             | 64.74%                              | 61.40%                                 |              |

<https://doi.org/10.1371/journal.pntd.0011324.t003>

hospital admissions at birth [11.4% vs 2.8% ( $p = 0.043$ )], and early resuscitation [4.7% vs 1.2% ( $p = 0.023$ )] compared to the infants whose mothers had normal thiamine levels (Table 4).

## Discussion

This study is the first representative data on thiamine status in pregnant women attending the antenatal clinic in a northern state of India with endemic thiamine deficiency. Our study

**Table 4. Perinatal outcome of the study population.**

| Outcome                            | All Participants (n = 492) | Low thiamine Group (n = 188) | Normal thiamine Group (n = 304) | P-value |
|------------------------------------|----------------------------|------------------------------|---------------------------------|---------|
| <b>Perinatal outcome</b>           |                            |                              |                                 |         |
| Death                              | 7(1.4)                     | 6 (3.1)                      | 1 (0.3)                         | 0.014   |
| Early neonatal hospital admissions | 31 (6.2)                   | 22 (11.5)                    | 9 (2.8)                         | 0.043   |
| Early resuscitation                | 13 (2.5)                   | 9 (4.7)                      | 4 (1.2)                         | 0.023   |

<https://doi.org/10.1371/journal.pntd.0011324.t004>



found a high prevalence of poor thiamine status among pregnant women with 38.2% ( $n = 188$ ) participants reporting low thiamine levels. This result was consistent with the study conducted by Whitfield and colleagues on Cambodian women of childbearing age wherein they reported a prevalence of 27% using the most conservative cut-off of thiamine  $<120$  nmol/L [30]. Another study conducted by Bourassa and coworkers in Gambian women of reproductive age reported that 35.8% of women were at high-risk  $ETKac \geq 1.25$ . There are no studies available to determine the thiamine demand of a developing fetus or exclusively breastfed infants and the cutoff level for whole-blood thiamine during pregnancy has not been established [31]. There are several reports of thiamine deficiency from our area with varied manifestations including an infantile form [15–18], Wernicke's encephalopathy [32] in adults, postpartum polyneuropathy [23], a gastric form of beriberi [33] and high-output heart failure of young [34]. Given the number of cases of infantile beriberi from Kashmir combined with the clinical evidence of thiamine deficiency in peripartum women, we expect that thiamine deficiency during pregnancy is under-recognized and underreported due to varied manifestations in addition to the possibility of subclinical deficiency. No studies so far have reported the burden of thiamine deficiency in pregnant women in our population. In the current study, we have attempted to present the clinical and laboratory gamut of thiamine deficiency during pregnancy and its association with perinatal outcomes.

Infant mortality due to beriberi still remains a problem across different communities worldwide [35–37]. After delivery, the infants grow rapidly and the demand for thiamine rises steeply while the breastmilk of a thiamine-deficient mother may not contain thiamine levels commensurate with these growing demands of the infant [38]. Few studies have reported the sequestration of thiamine in utero keeping thiamine levels normal in newborns and making neonatal deficiency rare [39,40] additionally, previous studies suggest that thiamine deficiency peaks at 3 months of age due to changes in metabolic activity [41]. On contrary, our study reports early infant mortality and poor perinatal outcome in association with the low thiamine status of the mother, suggesting a possibility of thiamine deficiency in the early neonatal period. This was in consonance with the previous studies reporting either infantile beriberi or sudden infant death syndrome (SIDS) among infants born to thiamine-deficient mothers. Jeffrey et al. [42] reported a high incidence of thiamine deficiency in 'near-miss' sudden infant death syndrome (SIDS) infants and their mothers and in siblings of SIDS from a westernized Caucasian community in Australia. The thiamine-deficient infants had a high familial incidence of SIDS deaths. These 'high-risk families might reflect poor nutrition or genetic defects of thiamine uptake and metabolism. Another study conducted by Barennes et al. [10], reported that infantile beriberi in northern Laos mainly occurred in infants breastfed by mothers with an inadequate intake of thiamine. They reported 5.6% of infant deaths while 90.2% of infants recovered after receiving a prompt treatment of parenteral thiamine.

A fall in whole-blood thiamine with the advance in pregnancy across three trimesters has been noted in our study, however, the finding did not reach statistical significance (Fig 1). This is consistent with the increased physiological demands during pregnancy. In pregnancy, the renal plasma flow and glomerular filtration rate (GFR) both increase, compared to non-pregnant levels, by 40–65% and 50–85%, respectively [43] which could possibly lead to increased excretion of thiamine. Although previous studies indicate the preferential delivery of thiamine to the developing fetus during pregnancy [9] hence, given that we only have maternal thiamine status, it is possible that lower thiamine level in the third trimester is simply a signal of increasing demand from growing fetus with the progression of pregnancy.

We reported a significant association between low thiamine status and lower socioeconomic status. This observation is consistent with a study in which mothers of infants with clinical beriberi were poorer and had received less formal education than the mothers of the

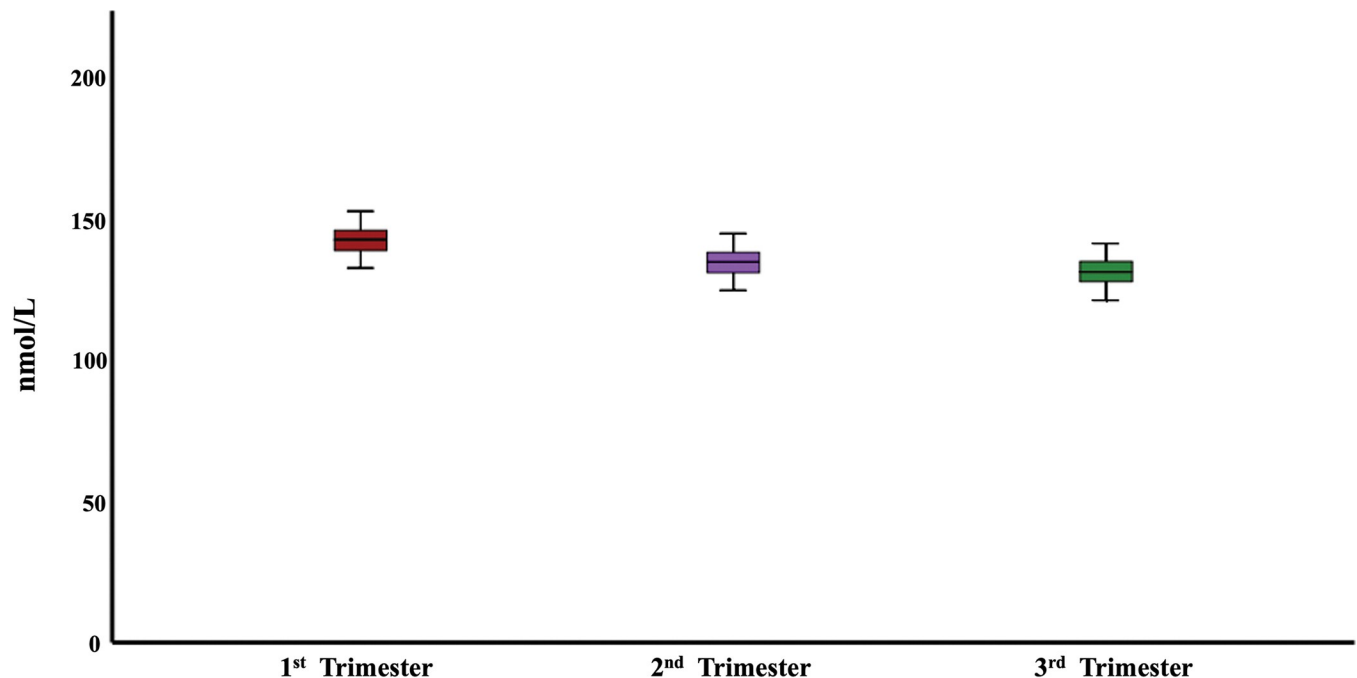

Fig 1. Thiamine levels (nmol/L) during three trimesters of pregnancy.

<https://doi.org/10.1371/journal.pntd.0011324.g001>

control infants [44]. Thiamine deficiency has primarily been reported in Africa, and Asia with the majority of cases from Southeast Asia. This has predominantly been attributed to the disparities in the nutrient content in the general food supply, dietary habits including relying on low-thiamine staple foods, and avoidance of certain foods [45]. Also, people living in refugee camps, prison populations, and those living in extremely poor conditions are more likely to experience a nutritional shortage, especially of water-soluble nutrients [46,47]. Nonetheless, poor socioeconomic status can itself be an independent risk factor for low thiamine status.

In our study population, low thiamine was significantly associated with higher consumption of white-polished ration rice. The washing of rice more than three times was also associated with low thiamine levels in whole blood. A high carbohydrate white-milled polished rice is the staple food of Kashmir consumed twice daily and customarily washed 2–3 times before cooking and the cooking water is discarded after boiling. This cooking practice along with polishing deprives the rice of thiamine rich envelop [48]. Additionally, culturally determined prenatal and postpartum dietary restrictions (eating mostly white rice and soup) and food avoidances (pulses and cheese) [49] provide insufficient thiamine. This along with the rapid depletion of the body's stores of thiamine within 18 days of a deficient state [50] likely add to the problem. We observed that the higher the consumption of Kashmiri salt pink tea (specially prepared by boiling over long periods of time with baking soda) and pickles, the lesser the thiamine content in the blood. This again is in consonance with the previous data that reports the presence of thiamine antagonists and thiaminases in various foods like pickles and tea, leading to insufficiency of thiamine in adults [31,51]. Also, the process of preparation of pickles includes the fermentation step which causes loss of thiamine due to leaching into the fermentation brine, and the same has been found in the packing step [52]. The percentage of calories derived from carbohydrates is higher in women with low thiamine status. This is consistent with the study conducted by Elmadfa et al. that reports the drop in thiamine levels in the blood and urine as carbohydrate consumption rises from 55% to 65% and 75% of total caloric intake,

respectively, for four days in a row [53]. It is known that a high carbohydrate diet increases the requirement of thiamine in the body to a minimum of 0.33 mg per 1,000 Kcal [54].

Thiamine deficiency is the most overlooked condition during pregnancy and breastfeeding due to its variable clinical presentation. Thus, in absence of a readily available test for thiamine detection, the treatment remains a challenging task with clinicians often missing out on simple thiamine challenge to preclude the fatal consequences of thiamine deficiency in the mother as well as in the infant. The present study reports a range of clinical symptoms that were significantly associated with the low thiamine status of women, including, nausea, vomiting, lethargy, loss of appetite, heart rate >100 bpm and PND/Orthopnoea. Many studies have previously reported that the deficiency of thiamine is exacerbated in hyperemesis gravidarum by the decreased absorption produced by intractable vomiting [55,56]. While the demand for thiamine is estimated to increase by >45% during pregnancy [57], loss of appetite leads to inadequate consumption of thiamine-rich foods (such as beef, and eggs) which further causes prodromal characteristics of thiamine deficiency.

The biochemical parameters reveal a significant difference in serum total protein, serum albumin and serum urea between the women with low thiamine status and those with normal thiamine. This difference explains the low nutritional status of pregnant women in Kashmir. Again, the low thiamine group had lower random blood sugar compared to women with normal thiamine which again explains the overall low-calorie intake. Low haemoglobin in association with low thiamine in our population also explains the lower nutritional status of women. This is in line with the study conducted by Ayensu and coworkers who reported poor dietary diversity, undernutrition, and anaemia associated with pregnancy [58]. The biochemical parameters associated with thiamine deficiency have not been explained previously in our population.

Since the frequency of thiamine deficiency and/or suboptimal thiamine status varies greatly depending on the cut-off utilized, assessing the gravity of low thiamine status as a public health concern in Kashmir is challenging. Our study notably is the first large-scale evaluation of pregnant women for whole blood thiamine levels using high-performance liquid chromatography (HPLC). Although the measurement of erythrocyte transketolase activity is the most reliable method for the estimation of thiamine levels, but the assessment of whole-blood thiamine by HPLC has overcome several limitations of the functional assay and exhibits strong correlations with erythrocyte transketolase activity coefficient [19]. This method, used to determine thiamine status, has developed over time. Nevertheless, it is pertinent to mention that the whole-blood ThDP levels in our study were not normalized to RBC volume or haemoglobin concentrations, which substantiates large population-based studies. Our study explores the burden of thiamine deficiency in the vulnerable state of pregnancy because thiamine-deficient mothers put their infants at an increased risk of infantile beriberi [38,39,59] and in turn mortality [60]. However, a possible recall bias while interviewing pregnant women regarding the nature of signs and symptoms and diet remains a major limiting factor in our study. Also, we enrolled the study participants from the hospital setting, which is an important limitation of this study. Further studies are needed to elucidate the full potential of thiamine supplementation in the gravid and breastfeeding states as well as to determine the cut-off levels of whole blood thiamine in these states.

## Conclusion

In conclusion, a high prevalence of biochemical evidence of thiamine deficiency is reported in pregnant women of Kashmir. This has primarily been associated with poor nutritional status. The use of white polished milled ration rice as a staple and intake of foods with possible

interference (like tea) with thiamine absorption are among the primary contributory factors of thiamine deficiency in our population. All the more important is that poor thiamine status is associated with poor perinatal outcomes in our study. In addition to the overt thiamine deficiency in infants, there remains a possibility of subclinical thiamine deficiency leading to subtle cognitive and psychomotor defects in infants which needs to be evaluated. Further, it is likely that the initiatives to supplement thiamine in pregnant women and to improve their overall nutritional health would serve a better outcome in terms of infant mortality.

## Author Contributions

**Conceptualization:** Ozaifa Kareem, Sobia Nisar.

**Data curation:** Ozaifa Kareem.

**Formal analysis:** Ozaifa Kareem, Umar Muzaffer.

**Investigation:** Ozaifa Kareem.

**Methodology:** Ozaifa Kareem, Sobia Nisar, Masood Tanvir.

**Project administration:** Ozaifa Kareem, Samiya Mufti, Sobia Nisar, Nahida Ali, Ishfaq Ahmad Sheikh.

**Resources:** Samiya Mufti.

**Supervision:** Sobia Nisar, Masood Tanvir, Ghulam Nabi Bader.

**Validation:** Ghulam Nabi Bader.

**Writing – original draft:** Ozaifa Kareem.

**Writing – review & editing:** Ozaifa Kareem, Sobia Nisar, Umar Muzaffer, Ghulam Nabi Bader.

## References

1. Chandrakumar A, Bhardwaj A, 'Jong GW. Review of thiamine deficiency disorders: Wernicke encephalopathy and Korsakoff psychosis. *J Basic Clin Physiol Pharmacol*. 2019 Mar 26; 30(2):153–62.
2. Palmieri F, Monné M, Fiermonte G, Palmieri L. Mitochondrial transport and metabolism of the vitamin B-derived cofactors thiamine pyrophosphate, coenzyme A, FAD and NAD<sup>+</sup>, and related diseases: A review. *IUBMB Life*. 2022 Jul 18; 74(7):592–617. <https://doi.org/10.1002/iub.2612> PMID: 35304818
3. Pacei F, Tesone A, Laudi N, Laudi E, Cretti A, Pnini S, et al. The relevance of thiamine evaluation in a practical setting. *Nutrients*. 2020 Sep 1; 12(9):1–17.
4. Farhan Sarwar M, Haroon Sarwar M, Sarwar M. Deficiency of Vitamin B-Complex and Its Relation with Body Disorders. In: *B-Complex Vitamins—Sources, Intakes and Novel Applications*. IntechOpen; 2022.
5. McCandless DW. *Thiamine Deficiency and Associated Clinical Disorders*. Totowa, NJ: Humana Press; 2009.
6. Bourassa MW, Bergeron G, Brown KH. A fresh look at thiamine deficiency—new analyses by the global thiamine alliance. *Ann N Y Acad Sci*. 2021 Aug 3; 1498(1):5–8. <https://doi.org/10.1111/nyas.14594> PMID: 33939178
7. Harrison M, editor. *Nutrition During Pregnancy and Lactation*. Washington, D.C.: National Academies Press; 2020.
8. Allen LH. B Vitamins in Breast Milk: Relative Importance of Maternal Status and Intake, and Effects on Infant Status and function. *Advances in Nutrition*. 2012 May 1; 3(3):362–9. <https://doi.org/10.3945/an.111.001172> PMID: 22585913
9. McGready R, Simpson JA, Cho T, Dubowitz L, Changbumrung S, Böhm V, et al. Postpartum thiamine deficiency in a Karen displaced population. *Am J Clin Nutr [Internet]*. 2001 Dec 1; 74(6):808–13. Available from: <https://academic.oup.com/ajcn/article/74/6/808/4737481> <https://doi.org/10.1093/ajcn/74.6.808> PMID: 11722964

10. Barennes H, Sengkhomyong K, René JP, Phimmasane M. Beriberi (Thiamine Deficiency) and High Infant Mortality in Northern Laos. Franco-Paredes C, editor. *PLoS Negl Trop Dis* [Internet]. 2015 Mar 17; 9(3):e0003581. Available from: <https://dx.plos.org/10.1371/journal.pntd.0003581>
11. Coats D, Frank EL, Reid JM, Ou K, Chea M, Khin M, et al. Thiamine pharmacokinetics in Cambodian mothers and their breastfed infants. *American Journal of Clinical Nutrition*. 2013 Sep 1; 98(3):839–44. <https://doi.org/10.3945/ajcn.113.062737> PMID: 23864540
12. Coats D, Shelton-Dodge K, Ou K, Khun V, Seab S, Sok K, et al. Thiamine Deficiency in Cambodian Infants with and without Beriberi. *J Pediatr*. 2012 Nov; 161(5):843–7. <https://doi.org/10.1016/j.jpeds.2012.05.006> PMID: 22703952
13. Harel Y, Zuk L, Guindy M, Nakar O, Lotan D, Fattal-Valevski A. The effect of subclinical infantile thiamine deficiency on motor function in preschool children. *Matern Child Nutr*. 2017 Oct 29; 13(4). <https://doi.org/10.1111/mcn.12397> PMID: 28133900
14. FATTAL-VALEVSKI A, AZOURI-FATTAL I, GREENSTEIN YJ, GUINDY M, BLAU A, ZELNIK N. Delayed language development due to infantile thiamine deficiency. *Dev Med Child Neurol*. 2009 Aug; 51(8):629–34. <https://doi.org/10.1111/j.1469-8749.2008.03161.x> PMID: 19191836
15. Wani NA, Qureshi UA, Ahmad K, Choh NA. Cranial Ultrasonography in Infantile Encephalitic Beriberi: A Useful First-Line Imaging Tool for Screening and Diagnosis in Suspected Cases. *American Journal of Neuroradiology* [Internet]. 2016 Aug 1; 37(8):1535–40. Available from: <http://www.ajnr.org/cgi/doi/10.3174/ajnr.A4756> PMID: 27056426
16. Qureshi UA, Wani NA, Ahmad K, Irshad M, Ali I. Infantile Wernicke's encephalopathy. *Arch Dis Child* [Internet]. 2015 Jul; 100(7):648–648. Available from: <https://adc.bmj.com/lookup/doi/10.1136/archdischild-2014-307949> PMID: 25564535
17. Qureshi UA, Sami A, Altaf U, Ahmad K, Iqbal J, Wani NA, et al. Thiamine responsive acute life threatening metabolic acidosis in exclusively breast-fed infants. *Nutrition*. 2016 Feb 1; 32(2):213–6. <https://doi.org/10.1016/j.nut.2015.08.007> PMID: 26515900
18. Bhat JI, Rather HA, Ahangar AA, Qureshi UA, Dar P, Ahmed QI, et al. Shoshin beriberi-thiamine responsive pulmonary hypertension in exclusively breastfed infants: A study from northern India. *Indian Heart J*. 2017 Jan 1; 69(1):24–7. <https://doi.org/10.1016/j.ihj.2016.07.015> PMID: 28228301
19. Marrs C, Lonsdale D. Hiding in Plain Sight: Modern Thiamine Deficiency. *Cells*. 2021 Sep 29; 10(10):2595. <https://doi.org/10.3390/cells10102595> PMID: 34685573
20. Ramulondi M, de Wet H, Ntuli NR. Traditional food taboos and practices during pregnancy, postpartum recovery, and infant care of Zulu women in northern KwaZulu-Natal. *J Ethnobiol Ethnomed*. 2021 Dec 20; 17(1):15. <https://doi.org/10.1186/s13002-021-00451-2> PMID: 33743760
21. Smith TJ, Tan X, Arnold CD, Sitthideth D, Kounnavong S, Hess SY. Traditional prenatal and postpartum food restrictions among women in northern Lao PDR. *Matern Child Nutr*. 2022 Jan 30; 18(1). <https://doi.org/10.1111/mcn.13273> PMID: 34595830
22. Chen LW, Low YL, Fok D, Han WM, Chong YS, Gluckman P, et al. Dietary changes during pregnancy and the postpartum period in Singaporean Chinese, Malay and Indian women: the GUSTO birth cohort study. *Public Health Nutr*. 2014 Sep 28; 17(9):1930–8. <https://doi.org/10.1017/S1368980013001730> PMID: 23806144
23. Hilal Ahmad S, Ahmad SB, Jan A. Thiamine deficiency related peripheral neuropathy in peripartum women of Kashmir, India: a hospital based study. *International Journal of Advances in Medicine*. 2019; 6(3):662.
24. Körner RW, Vierzig A, Roth B, Müller C. Determination of thiamin diphosphate in whole blood samples by high-performance liquid chromatography-A method suitable for pediatric diagnostics. *J Chromatogr B Analyt Technol Biomed Life Sci*. 2009 Jul 1; 877(20–21):1882–6. <https://doi.org/10.1016/j.jchromb.2009.05.013> PMID: 19487165
25. Coats D, Frank EL, Reid JM, Ou K, Chea M, Khin M, et al. Thiamine pharmacokinetics in Cambodian mothers and their breastfed infants. *American Journal of Clinical Nutrition*. 2013 Sep 1; 98(3):839–44. <https://doi.org/10.3945/ajcn.113.062737> PMID: 23864540
26. Institute of Medicine (US) Standing Committee on the Scientific Evaluation of Dietary Reference Intakes and its Panel on Folate OBV and C. Dietary Reference Intakes for Thiamin, Riboflavin, Niacin, Vitamin B6, Folate, Vitamin B12, Pantothenic Acid, Biotin, and Choline. *Dietary Reference Intakes for Thiamin, Riboflavin, Niacin, Vitamin B6, Folate, Vitamin B12, Pantothenic Acid, Biotin, and Choline*. 1998;6–8.
27. Johnson CR, Fischer PR, Thacher TD, Topazian MD, Bourassa MW, Combs GF. Thiamin deficiency in low- and middle-income countries: Disorders, prevalences, previous interventions and current recommendations. *Nutr Health*. 2019 Jun 24; 25(2):127–51. <https://doi.org/10.1177/0260106019830847> PMID: 30798767
28. Lu J, Frank EL. Rapid HPLC Measurement of Thiamine and Its Phosphate Esters in Whole Blood. *Clin Chem*. 2008 May 1; 54(5):901–6. <https://doi.org/10.1373/clinchem.2007.099077> PMID: 18356241

29. Tandon R, Jain A, Malhotra P. Management of Iron Deficiency Anemia in Pregnancy in India. *Indian Journal of Hematology and Blood Transfusion*. 2018 Apr 14; 34(2):204–15. <https://doi.org/10.1007/s12288-018-0949-6> PMID: 29622861
30. Whitfield KC, Smith G, Chamnan C, Karakochuk CD, Sophonneary P, Kuong K, et al. High prevalence of thiamine (vitamin B1) deficiency in early childhood among a nationally representative sample of Cambodian women of childbearing age and their children. *PLoS Negl Trop Dis*. 2017; 11(9):1–15. <https://doi.org/10.1371/journal.pntd.0005814> PMID: 28873391
31. Whitfield KC, Bourassa MW, Adamolekun B, Bergeron G, Bettendorff L, Brown KH, et al. Thiamine deficiency disorders: diagnosis, prevalence, and a roadmap for global control programs. *Ann N Y Acad Sci*. 2018; 1430:3–43. <https://doi.org/10.1111/nyas.13919> PMID: 30151974
32. Shah IA, Asimi RP, Kawoos Y, Wani M, Saleem T, Baba WN. Nonalcoholic Wernicke's Encephalopathy: A Retrospective Study from a Tertiary Care Center in Northern India. *J Neurosci Rural Pract*. 2017 Jul 3; 08(03):401–6. [https://doi.org/10.4103/jnpr.jnpr\\_14\\_17](https://doi.org/10.4103/jnpr.jnpr_14_17) PMID: 28694620
33. Nisar S, Tanvir M, Ganai MohdA, Kareem O, Muzaffer U, Wani IH. Clinical profile of subjects presenting as thiamine responsive upper GI upset: a pointer towards gastric beriberi. *Nutrition*. 2022 Oct;111730.
34. Nisar S, Mohi-u-din K, Tak SI, Andrabi SMA, Tanvir M, Muzaffer U, et al. Thiamine responsive high output heart failure of adults: an under-recognized entity. *Eur J Clin Nutr*. 2023; <https://doi.org/10.1038/s41430-023-01279-7> PMID: 36859659
35. Thankaraj S, Koshy RM, Ismavel V. Infantile Cardiac Beriberi in Rural North East India. *Indian Pediatr*. 2020 Sep 18; 57(9):859–60. <https://doi.org/10.1007/s13312-020-1969-5> PMID: 32999118
36. Khounnorath S, Chamberlain K, Taylor AM, Soukaloun D, Mayxay M, Lee SJ, et al. Clinically Unapparent Infantile Thiamin Deficiency in Vientiane, Laos. *PLoS Negl Trop Dis*. 2011 Feb 22; 5(2):e969. <https://doi.org/10.1371/journal.pntd.0000969> PMID: 21423705
37. Thankaraj S, Koshy RM, Ismavel V. Infantile Cardiac Beriberi in Rural North East India. *Indian Pediatr*. 2020 Sep 18; 57(9):859–60. <https://doi.org/10.1007/s13312-020-1969-5> PMID: 32999118
38. Ortega RM, Martínez RM, Andrés P, Marín-Arias L, López-Sobaler AM. Thiamin status during the third trimester of pregnancy and its influence on thiamin concentrations in transition and mature breast milk. *British Journal of Nutrition*. 2004 Jul 9; 92(1):129–35. <https://doi.org/10.1079/BJN20041153> PMID: 15230996
39. Baker H, Frank O, Thomson AD, Langer A, Munves ED, de Angelis B, et al. Vitamin profile of 174 mothers and newborns at parturition. *Am J Clin Nutr*. 1975 Jan; 28(1):59–65. <https://doi.org/10.1093/ajcn/28.1.59> PMID: 1115019
40. Jeffrey HE, McCleary B v., Hensley WJ, Read DJC Thiamine Deficiency—A Neglected Problem of Infants and Mothers—Possible Relationships to Sudden Infant Death Syndrome. *Aust N Z J Obstet Gynaecol*. 1985 Aug; 25(3):198–202. <https://doi.org/10.1111/j.1479-828x.1985.tb00643.x> PMID: 3866557
41. Whitfield KC, Karakochuk CD, Kroeun H, Sokhoing L, Chan BB, Borath M, et al. Household Consumption of Thiamin-Fortified Fish Sauce Increases Erythrocyte Thiamin Concentrations among Rural Cambodian Women and Their Children Younger Than 5 Years of Age: A Randomized Controlled Efficacy Trial. *Journal of Pediatrics*. 2017 Feb 1; 181:242–247.e2. <https://doi.org/10.1016/j.jpeds.2016.10.066> PMID: 27939124
42. Jeffrey HE, McCleary B V., Hensley WJ, Read DJC. Thiamine Deficiency—A Neglected Problem of Infants and Mothers—Possible Relationships to Sudden Infant Death Syndrome. *Aust N Z J Obstet Gynaecol*. 1985 Aug; 25(3):198–202. <https://doi.org/10.1111/j.1479-828x.1985.tb00643.x> PMID: 3866557
43. Soma-Pillay P, Nelson-Piercy C, Tolppanen H, Mebazaa A. Physiological changes in pregnancy. *Cardiovasc J Afr*. 2016 Mar 1; 27(2):89–94. <https://doi.org/10.5830/CVJA-2016-021> PMID: 27213856
44. Soukaloun D, Kounnavong S, Pengdy B, Boupouha B, Durondej S, Olness K, et al. Dietary and socio-economic factors associated with beriberi in breastfed Lao infants. *Ann Trop Paediatr*. 2003 Sep 18; 23(3):181–6. <https://doi.org/10.1179/027249303322296493> PMID: 14567833
45. Johnson CR, Fischer PR, Thacher TD, Topazian MD, Bourassa MW, Combs GF. Thiamin deficiency in low- and middle-income countries: Disorders, prevalences, previous interventions and current recommendations. Vol. 25, *Nutrition and Health*. SAGE Publications Ltd; 2019. p. 127–51. <https://doi.org/10.1177/0260106019830847> PMID: 30798767
46. Başoğlu M, Yetimalar Y, Gürgör N, Büyükcatalbaş S, Kurt T, Seçil Y, et al. Neurological complications of prolonged hunger strike. *Eur J Neurol*. 2006 Oct; 13(10):1089–97. <https://doi.org/10.1111/j.1468-1331.2006.01531.x> PMID: 16987161
47. Dias FMV, Oliveira AS, da Silva DJ, Ribeiro AM. Thiamine Deficiency and Poverty. In: *Handbook of Famine, Starvation, and Nutrient Deprivation*. Cham: Springer International Publishing; 2018. p. 1–22.

48. Liu K, Zheng J, Wang X, Chen F. Effects of household cooking processes on mineral, vitamin B, and phytic acid contents and mineral bioaccessibility in rice. *Food Chem*. 2019 May; 280:59–64. <https://doi.org/10.1016/j.foodchem.2018.12.053> PMID: 30642507
49. Shakeel B, Azim H, Jabeen N. Traditional Food and Health Practices during Post-Partum Period: A Study among Tribal Women of Fakir Gujri, District Srinagar, Jammu and Kashmir. *Int J Curr Microbiol Appl Sci*. 2018 Aug 20; 7(08):1076–81.
50. Sechi G, Serra A. Wernicke's encephalopathy: new clinical settings and recent advances in diagnosis and management. *Lancet Neurol* [Internet]. 2007 May; 6(5):442–55. Available from: <https://linkinghub.elsevier.com/retrieve/pii/S1474442207701047> [https://doi.org/10.1016/S1474-4422\(07\)70104-7](https://doi.org/10.1016/S1474-4422(07)70104-7) PMID: 17434099
51. Ott M, Werneke U. Wernicke's encephalopathy—from basic science to clinical practice. Part 1: Understanding the role of thiamine. *Ther Adv Psychopharmacol*. 2020; 10:204512532097810.
52. Montañó A, Casado FJ, de Castro A, Sánchez AH, Rejano L. Vitamin content and amino acid composition of pickled garlic processed with and without fermentation. *J Agric Food Chem*. 2004 Dec 1; 52(24):7324–30. <https://doi.org/10.1021/jf040210i> PMID: 15563215
53. Elmadfa I, Majchrzak D, Rust P, Genser D. The Thiamine Status of Adult Humans Depends on Carbohydrate Intake. *International Journal for Vitamin and Nutrition Research* [Internet]. 2001 Jul 1; 71(4):217–21. Available from: <https://econtent.hogrefe.com/doi/> <https://doi.org/10.1024/0300-9831.71.4.217> PMID: 11582856
54. Dhir S, Tarasenko M, Napoli E, Giulivi C. Neurological, Psychiatric, and Biochemical Aspects of Thiamine Deficiency in Children and Adults. *Front Psychiatry* [Internet]. 2019 Apr 4;10. Available from: <https://www.frontiersin.org/article/10.3389/fpsy.2019.00207/full> PMID: 31019473
55. Fejzo MS, Trovik J, Grooten IJ, Sridharan K, Roseboom TJ, Vikanes Å, et al. Nausea and vomiting of pregnancy and hyperemesis gravidarum. *Nat Rev Dis Primers*. 2019 Dec 1; 5(1). <https://doi.org/10.1038/s41572-019-0110-3> PMID: 31515515
56. Maslin K, Dean C. Nutritional consequences and management of hyperemesis gravidarum: a narrative review. *Nutr Res Rev*. 2022 Dec 16; 35(2):308–18. <https://doi.org/10.1017/S0954422421000305> PMID: 34526158
57. Oudman E, Wijnia JW, Oey M, van Dam M, Painter RC, Postma A. Wernicke's encephalopathy in hyperemesis gravidarum: A systematic review. *European Journal of Obstetrics & Gynecology and Reproductive Biology*. 2019 May; 236:84–93. <https://doi.org/10.1016/j.ejogrb.2019.03.006> PMID: 30889425
58. Ayensu J, Annan R, Lutterodt H, Edusei A, Peng LS. Prevalence of anaemia and low intake of dietary nutrients in pregnant women living in rural and urban areas in the Ashanti region of Ghana. *PLoS One*. 2020 Jan 24; 15(1):e0226026. <https://doi.org/10.1371/journal.pone.0226026> PMID: 31978048
59. Allen LH. B Vitamins in Breast Milk: Relative Importance of Maternal Status and Intake, and Effects on Infant Status and function. *Advances in Nutrition*. 2012 May 1; 3(3):362–9. <https://doi.org/10.3945/an.111.001172> PMID: 22585913
60. Luxemburger C, White NJ, ter Kuile F, Singh HM, Allier-Frachon I, Ohn M, et al. Beri-beri: the major cause of infant mortality in Karen refugees. *Trans R Soc Trop Med Hyg* [Internet]. 2003; 97(2):251–5. Available from: <http://www.ncbi.nlm.nih.gov/pubmed/14584386> [https://doi.org/10.1016/s0035-9203\(03\)90134-9](https://doi.org/10.1016/s0035-9203(03)90134-9) PMID: 14584386
